# Supplementary material
Source: PubMed Central journal article supplement (PMC4841603)
Supplement: bi6b00115_si_001.pdf [file bi6b00115_si_001.pdf]

Supporting Information for:

## **Mechanism of germacradien-4-ol synthase controlled water capture**

Daniel J. Grundy,<sup>§</sup> Mengbin Chen,<sup>†</sup> Verónica González,<sup>§</sup> Stefano Leoni,<sup>§</sup> David J. Miller,<sup>§</sup> David W. Christianson<sup>†,¶</sup> and Rudolf K. Allemann<sup>§\*</sup>

<sup>§</sup> School of Chemistry, Cardiff University, Park Place, Cardiff CF10 3AT, United Kingdom

<sup>†</sup> Roy and Diana Vagelos Laboratories, Department of Chemistry, University of Pennsylvania, Philadelphia, Pennsylvania 19104-6323

<sup>¶</sup> Radcliffe Institute for Advanced Study, Harvard University, 10 Garden Street, Cambridge, MA 02138

|                                                                  |            |
|------------------------------------------------------------------|------------|
| <b>1. Materials</b>                                              | <b>S2</b>  |
| <b>2. General Procedures</b>                                     | <b>S2</b>  |
| <b>3. Synthetic Procedures</b>                                   | <b>S2</b>  |
| <b>4. Site-directed mutagenesis</b>                              | <b>S5</b>  |
| <b>5. Kinetic plots</b>                                          | <b>S6</b>  |
| <b>6. Analytical incubation</b>                                  | <b>S8</b>  |
| <b>7. GC-MS collection</b>                                       | <b>S10</b> |
| <b>8. 12,13-difluoro-(<i>E</i>)-<math>\beta</math>-farnesene</b> | <b>S18</b> |
| <b>9. References</b>                                             | <b>S20</b> |

**1. Materials.** A prestained protein size marker (6.5-175) kDa was used to identify proteins by 12% SDS-gel. The Amicon-YM30 membranes were used for protein concentration. [1-<sup>3</sup>H]-FDP (20 Ci/mmol) was purchased from American Radiolabeled Chemicals. Commercial [1-<sup>3</sup>H]-FDP was diluted by adding cold FDP to give a final specific activity of 24000 dpm/μM. For synthetic procedures, all chemicals and solvents were obtained from commercial vendors and used without further purification unless otherwise noted. Anhydrous tetrahydrofuran (THF), diethyl ether, toluene and acetonitrile were obtained from a MBraun SPS800 solvent purification system. Dichloromethane, and triethylamine were distilled from calcium hydride and KOH under nitrogen respectively. EtOH was distilled from calcium oxide.

<sup>1</sup>H and <sup>13</sup>C NMR spectra were measured on a Bruker Avance 500 NMR spectrometer or a Bruker Fourier300 NMR spectrometer and are reported as chemical shifts in parts per million downfield from tetramethylsilane, multiplicity (s = singlet, d = doublet, t = triplet, q = quartet, m = multiplet), coupling (to the nearest 0.5 Hz) and assignment, respectively. <sup>1</sup>H, <sup>13</sup>C and <sup>31</sup>P NMR spectra were measured on a Bruker Avance 500 NMR spectrometer and are reported as chemical shift downfield from tetramethylsilane (<sup>1</sup>H and <sup>13</sup>C) or 85% H<sub>3</sub>PO<sub>4</sub> (<sup>31</sup>P), coupling constant where appropriate and assignment. Assignments are made to the limitations of COSY, DEPT 90/135, gradient HSQC and gradient HMBBC spectra. <sup>31</sup>P NMR spectra were recorded on a Jeol Eclipse +300 NMR spectrometer or a Bruker Avance 500 NMR spectrometer.

**2. General Methods.** GC-MS analysis of incubation products was performed on a Hewlett Packard 6890 GC apparatus fitted with a J&W scientific DB-5MS column (30 m x 0.25 mm internal diameter) and a Micromass GCT Premiere detecting in the range *m/z* 50-800 in the EI<sup>+</sup> mode with scanning once a second with a scan time of 0.9 s. Method 1: The program uses an injection port temperature of 100 °C; split ratio 5:1; initial temperature 50 °C hold 1 min, ramp of 4 °C/min to 150 °C hold 15 min, ramp of 20 °C/min to 250 °C hold 3 min. High-resolution ES<sup>-</sup> mass spectra were measured on a Micromass LCT premiere XE spectrometer fitted with a Waters 1525 Micro binary HPLC pump. The purity of purified compounds was judged to be > 95% by TLC and/or GC analyses and NMR spectroscopic analysis. High-resolution ES<sup>-</sup> mass spectra were measured on a Micromass LCT premiere XE spectrometer fitted with a Waters 1525 Micro binary HPLC pump.

Thin layer chromatography was performed on pre-coated aluminium plates of silica G/UV<sub>254</sub>. TLC visualizations were performed with 4.2% ammonium molybdate and 0.2% ceric sulfate in 5 % H<sub>2</sub>SO<sub>4</sub>, or 0.1 % berberine hydrochloride in EtOH or UV light. Reverse phase HPLC was performed on a system comprising of a Dionex P680 pump and a Dionex UVD170U detector unit.

**3. Synthetic Procedures.** (*2E*, *6E*)-farnesyl diphosphate (**1**) was synthesized from commercial (*2E*, *6E*)-farnesol using the method described by Poulter.<sup>1,2</sup> (*RS*)-trans-nerolidyl diphosphate (NDP, **6**) was

prepared from commercial ( $\pm$ )-trans-nerolidol following the Cramer-Danilov protocol<sup>3-5</sup> as described by Karp *et al.*<sup>6</sup> with modifications.<sup>7</sup> The resulting silica gel purified (Bu)<sub>4</sub>N<sup>+</sup> form of NDP was converted to the NH<sub>4</sub><sup>+</sup> salt by ion exchange chromatography (Dowex 50W-X8). (2*Z*, 6*E*)-2*F*-Farnesyl diphosphate (**1b**) was synthesized as previously described.<sup>8</sup> 15F<sub>3</sub>-Farnesyl diphosphate (**1c**) was synthesized as previously reported.<sup>9</sup> (3*RS*)-(1*Z*)-trans-[1-<sup>3</sup>H]-Nerolidyl diphosphate<sup>10</sup> (activity 0.76 mCi/mmol) was prepared from (1*Z*)-trans-[1-<sup>3</sup>H]-nerolidol following the Cramer-Danilov protocol<sup>3-5</sup> as described by Karp *et al.*<sup>6</sup> with modifications.<sup>7</sup> (1*Z*)-trans-[1-<sup>3</sup>H]-Nerolidol was synthesized essentially as described by Cane<sup>10</sup> via the  $\gamma$ -cis-vinyllic metallation procedure first described by Julia,<sup>11</sup> using <sup>3</sup>H<sub>2</sub>O (activity 100 mCi/mL). (2*E*, 6*E*)-[12,13-F<sub>2</sub>] farnesyl diphosphate (**1d**) was synthesized from (2*E*, 6*E*)-[12,13-F<sub>2</sub>]-farnesol (difluorofarnesol) using the method described by Poulter.<sup>2,3</sup> [1,1-<sup>2</sup>H<sub>2</sub>]farnesol and (1*R*)-[1-<sup>2</sup>H]farnesol were prepared following the procedures reported by Cane<sup>12</sup> and phosphorylated using the method described by Poulter.<sup>1,2</sup> to give **1e** and **1f** respectively.

Difluorofarnesol was synthesized by Wittig reaction between difluoroacetone and the triphenylphosphonium bromide (**9**), which was prepared as previously reported,<sup>13</sup> Scheme S1.

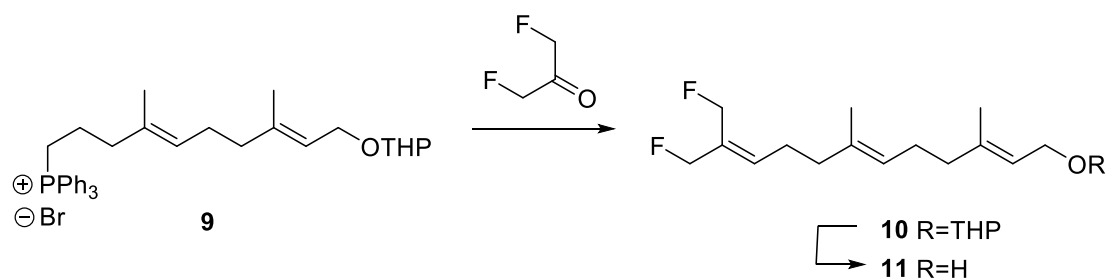

### Scheme S1. Synthesis of difluorofarnesol **11**

#### 2-(((2*E*,6*E*)-12-Fluoro-11-(fluoromethyl)-3,7-dimethyldodeca-2,6,10-trien-1-yl)oxy)tetrahydro-2H-pyran **8**

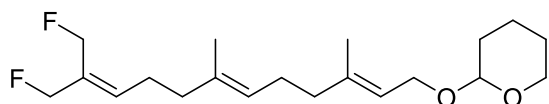

A stirred solution of **9** (140 mg, 0.23 mmol) in anhydrous THF (20 mL) was cooled to -78 °C and *n*-BuLi (100  $\mu$ L 2.5 M, 0.25 mmol) added, developing a deep yellow colour as the ylide was formed. Difluoroacetone (23 mg, 19  $\mu$ L, 0.25 mmol) was then added dropwise and the reaction was stirred at -78 °C for 2 h before being allowed to warm to -20 °C and quenched with water and Et<sub>2</sub>O (10 mL, 1:1). The aqueous layer was separated and further washed with Et<sub>2</sub>O (3 x 5 mL) and the combined ethereal extracts were washed with brine (20 mL), dried (MgSO<sub>4</sub>), filtered and concentrated under reduced pressure. Purification by column chromatography on silica (20% EtOAc in Hexane, R<sub>f</sub> 0.5) yielded the title compound as a colourless oil (38 mg, 47%). <sup>1</sup>H NMR (300 MHz, CDCl<sub>3</sub>)  $\delta$  5.89 – 5.79 (m, 1 H), 5.40 – 5.31 (m, 1 H), 5.16 – 5.09 (m, 1 H), 4.99 (d, 2 H, *J* 47.6), 4.87 (d, 2 H, *J* 47.6), 4.62 (t, 1 H, *J* 3.5), 4.13 (ddd, 2 H, *J* 68.0, 11.9, 7.2), 3.95 – 3.46 (m, 2 H), 2.42 – 1.96 (m, 6 H), 1.96 – 1.46 (m, 6 H), 1.69 (s, 3 H), 1.60 (s, 3 H); <sup>13</sup>C NMR (75 MHz, CDCl<sub>3</sub>)  $\delta$  140.19, 133.89, 125.23, 120.80, 98.00, 84.91 (d, *J* 168.0),

77.63 (d, *J* 156.8), 63.80, 62.46, 39.62, 30.84, 26.34, 25.62, 19.77, 16.56, 16.07; <sup>19</sup>F NMR (283 MHz, CDCl<sub>3</sub>) δ -211.84 (t, *J* 47.6), -216.85 (t, *J* 47.6); HRMS (ES<sup>+</sup>, [M + Na]<sup>+</sup>) found 365.2257, C<sub>20</sub>H<sub>32</sub>O<sub>2</sub>F<sub>2</sub>Na requires 365.2268.

**(2E,6E)-12-Fluoro-11-(fluoromethyl)-3,7-dimethyldodeca-2,6,10-trien-1-ol 9**

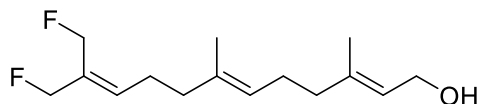

To a stirred solution of **10** (38 mg, 0.11 mmol) in methanol (10 mL) was added *p*-toluenesulfonic acid (1 mg, 0.0055 mmol) and the mixture was stirred at room temperature for 2 h. The volume of methanol was reduced by 80 % under reduced pressure, then saturated aqueous, NaHCO<sub>3</sub> (10 mL) and hexane (10 mL) were added. The separated aqueous layer was further washed with hexane (3 x 5 mL) and the combined organic fractions were washed with brine (10 mL), dried over anhydrous MgSO<sub>4</sub>, then filtered and concentrated under reduced pressure. Purification by column chromatography on silica (20% EtOAc in Hexane, R<sub>f</sub> 0.29) yielded the title compound in 91% yield (28 mg, 0.10 mmol). <sup>1</sup>H NMR (300 MHz, CDCl<sub>3</sub>) δ 5.89 – 5.80 (m, 1 H), 5.45 – 5.37 (m, 1 H), 5.19 – 5.09 (m, 1 H), 4.99 (d, 2 H, *J* 47.6), 4.87 (d, 2 H, *J* 47.6), 4.16 (d, 2 H, *J* 6.9), 2.33 – 1.96 (m, 8 H), 1.68 (s, 3 H), 1.60 (s, 3 H); <sup>13</sup>C NMR (75 MHz, CDCl<sub>3</sub>) δ 139.69, 133.99, 125.11, 123.55, 84.84 (d, *J* 164.3), 77.63 (d, *J* 168.0), 59.53, 39.51, 38.96, 26.31, 16.41, 16.06; <sup>19</sup>F NMR (283 MHz, CDCl<sub>3</sub>) δ -214.24 (t, *J* 47.4), -219.22 (t, *J* 47.4); HRMS (APCI<sup>+</sup>, [M + Na]<sup>+</sup>) found 281.1683, C<sub>15</sub>H<sub>24</sub>O<sub>2</sub>F<sub>2</sub>Na requires 281.1693.

**(2E,6E)-12-Fluoro-11-(fluoromethyl)-3,7-dimethyldodeca-2,6,10-trien-1-yl tris-ammonium diphosphate 1d**

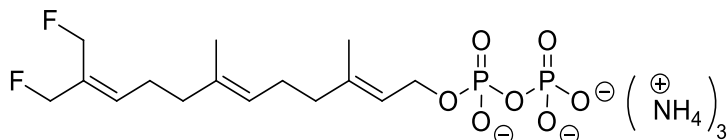

The difluorofarnesyl diphosphate trisammonium salt was prepared from **11** using the method described by Poulter,<sup>1,2</sup> to give the title compound as a white solid in 59% yield (27.7 mg, 0.059 mmol). <sup>1</sup>H NMR (500 MHz, D<sub>2</sub>O) δ 6.08 – 5.98 (m, 1 H), 5.46 (t, 1H, *J* = 7.3 Hz), 5.23 (t, 1 H, *J* = 6.9), 5.10 (d, 2 H, *J* 47.6), 4.95 (d, 2 H, *J* 47.6), 4.47 (t, 2 H, *J* 6.6), 2.40 – 2.03 (m, 8 H), 1.72 (s, 3 H), 1.62 (s, 3 H); <sup>19</sup>F NMR (283 MHz, D<sub>2</sub>O) δ -207.11 (t, *J* 47.4), -212.67 (t, *J* 47.5); <sup>31</sup>P NMR (202 MHz, D<sub>2</sub>O) -6.17 (d, *J* 19.0), -10.18 (d, *J* 21). HRMS (ES<sup>-</sup>, [M - H]<sup>-</sup>) found 417.1037, C<sub>15</sub>H<sub>25</sub>O<sub>7</sub>F<sub>2</sub>P<sub>2</sub> requires 417.1044.

**4. Site-directed mutagenesis.** The Quickchange site-directed mutagenesis kit (Stratagene) was used to introduce the desired mutation according to the manufacturer instructions. Plasmids were purified from overnight LB/ampicillin cultures (5 mL) using the QIAGEN miniprep kit as described by the manufacturer. Mutations were confirmed by DNA sequence analysis using Eurofins MWG Operon's DNA sequencing service.

**Table S1.** Mutagenic primers, with the mutated codon underlined

| Name            | 5' -Sequence- 3'                          |
|-----------------|-------------------------------------------|
| Gdols-Y303F Fwd | CTGGCTCGCGGGTTTTCTCCACTGGGAGTC            |
| Gdols-Y303F Rev | GACTCCCAGTGGAGAAAACCCGCGAGCCAG            |
| Gdols-Y303I Fwd | CTCTGGCTCGCGGGT <u>ATT</u> CTCCACTGGGAGTC |
| Gdols-Y303I Rev | GACTCCCAGTGGAGAATACCCGCGAGCCAGAG          |
| Gdols-E307Q Fwd | GTTACCTCCACTGGCAGTCCCACACCCG              |
| Gdols-E307Q Rev | CGGGTGTGGGACTGCCAGTGGAGGTAAC              |
| Gdols-E307M Fwd | GTTACCTCCACTGGATGTCCCACACCCG              |
| Gdols-E307M Rev | GCGGGTGTGGGACATCCAGTGGAGGTAAC             |
| Gdols-Y303T Fwd | CTCTGGCTCGCGGGTACCCTCCACTGGGAGTC          |
| Gdols-Y303T Rev | GACTCCCAGTGGAGGGTACCCGCGAGCCAGAG          |
| Gdols-D80E Fwd  | CTACTTCTCTTTCGAAGACCAGTTCGACAG            |
| Gdols-D80E Rev  | CTGTGCAACTGGTCTTCGAAGAGGAAGTAG            |
| Gdols-D81E Fwd  | CCTCTTCGACGAACAGTTCGACAGCC                |
| Gdols-D81E Rev  | GGCTGTGCAACTGTTTCGTCGAAGAGG               |
| Gdols-D84E Fwd  | CGACCAGTTCGAAAGCCCGCTCGGG                 |
| Gdols-D84E Rev  | CCCGAGCGGGCTTTTCGAACTGGTTCG               |
| Gdols-N218Q Fwd | CATCCCGTCGTTACCCAGGACGTGCGCTCCTTC         |
| Gdols-N218Q Rev | GAAGGAGCGCACGTCTTGGGTGAACGACGGGATG        |
| Gdols-S222A Fwd | CCAATGACGTGCGCGCGTTCGCACAGGAGTC           |
| Gdols-S222A Rev | GACTCCTGTGCGAACGCGCGCACGTCATTGG           |
| Gdols-E226D Fwd | CTTCGCACAGGATTCCGAGCGCGGC                 |
| Gdols-E226D Rev | GCCGCGCTCGGAATCCTGTGCGAAG                 |
| Gdols-N218L Fwd | CATCCCGTCGTTACCCCTGGACGTGCGCTCCTTC        |
| Gdols-N218L Rev | GAAGGAGCGCACGTCCAGGGTGAACGACGGGATG        |
| Gdols-D80N Fwd  | GGTTCTACTTCTCTTCAATGACCAGTTCGACAGCC       |
| Gdols-D80N Rev  | GGCTGTGCAACTGGTCATTGAAGAGGAAGTAGAACC      |
| Gdols-D81N Fwd  | CTACTTCTCTTCGACAATCAGTTCGACAGCCCGC        |
| Gdols-D81N Rev  | GCGGGCTGTGCAACTGATTGTGCAAGAGGAAGTAG       |
| Gdols-D84N Fwd  | GACGACCAGTTCGAATAGCCCGCTCGG               |
| Gdols-D84N Rev  | CCGAGCGGGCTATTGAACTGGTCGTC                |
| Gdols-N218E Fwd | CATCCCGTCGTTACCCGAAGACGTGCGCTCCTTC        |
| Gdols-N218E Rev | GAAGGAGCGCACGTCTTCGGTGAACGACGGGATG        |
| Gdols-N218T Fwd | CGTCGTTACCCACCGACGTGCGCTCC                |
| Gdols-N218T Rev | GGAGCGCACGTCGGTGGTGAACGACG                |
| Gdols-E248A Fwd | CTGCTCCACCGCAGAGGCCTG                     |
| Gdols-E248A Rev | CAGGCCTCTGCGGTGGAGCAG                     |

## 5. Kinetic Plots.

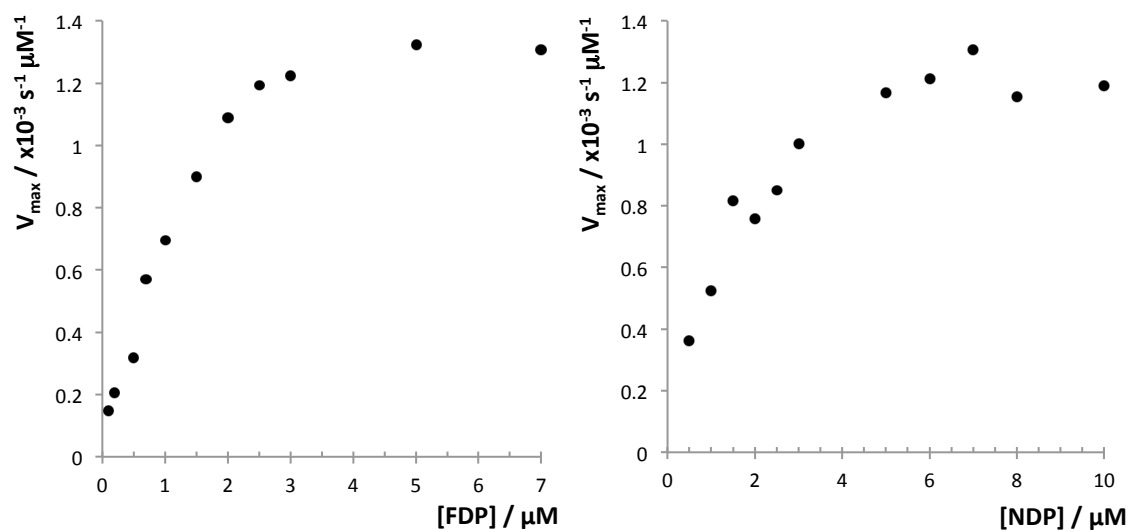

**Figure S1.** Representative Michaelis-Menten plot of Gdols with FDP (left) and NDP (right)

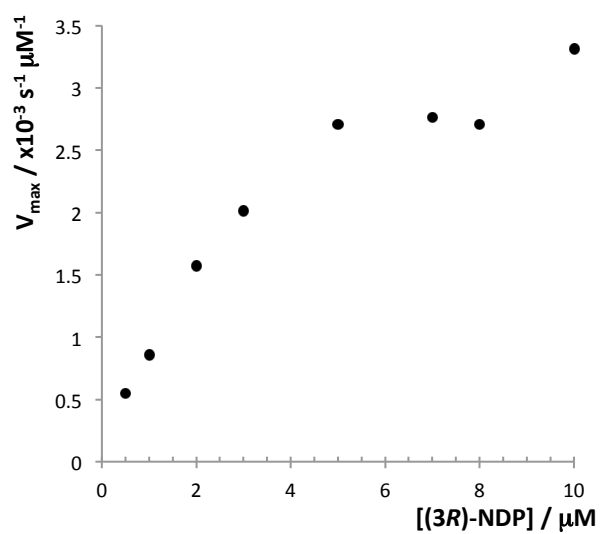

**Figure S2.** Representative Michaelis-Menten plot of Gdols with (3R)-NDP

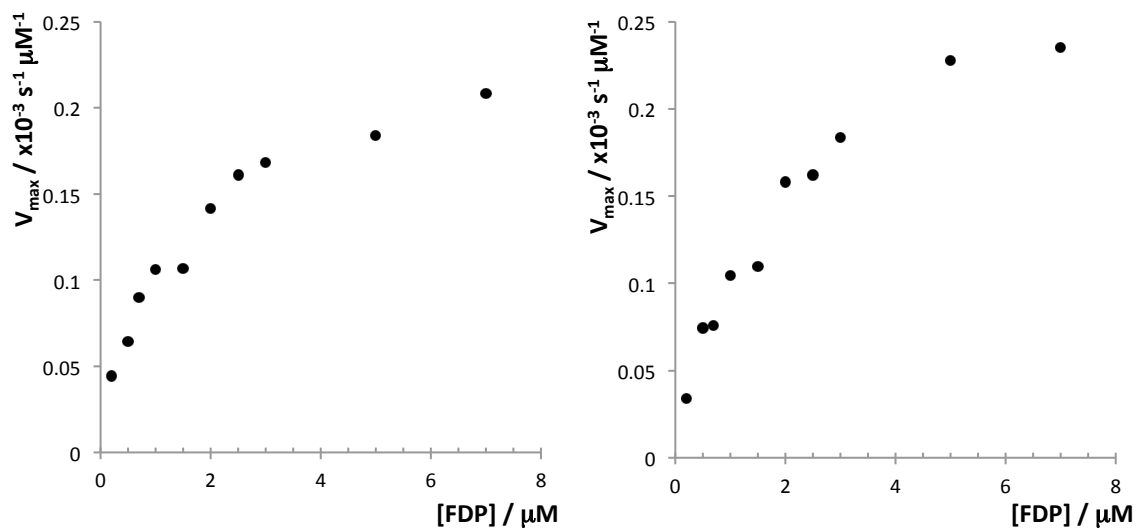

**Figure S3.** Representative Michaelis-Menten plot of Gdols-D81E and Gdols-D84E with FDP

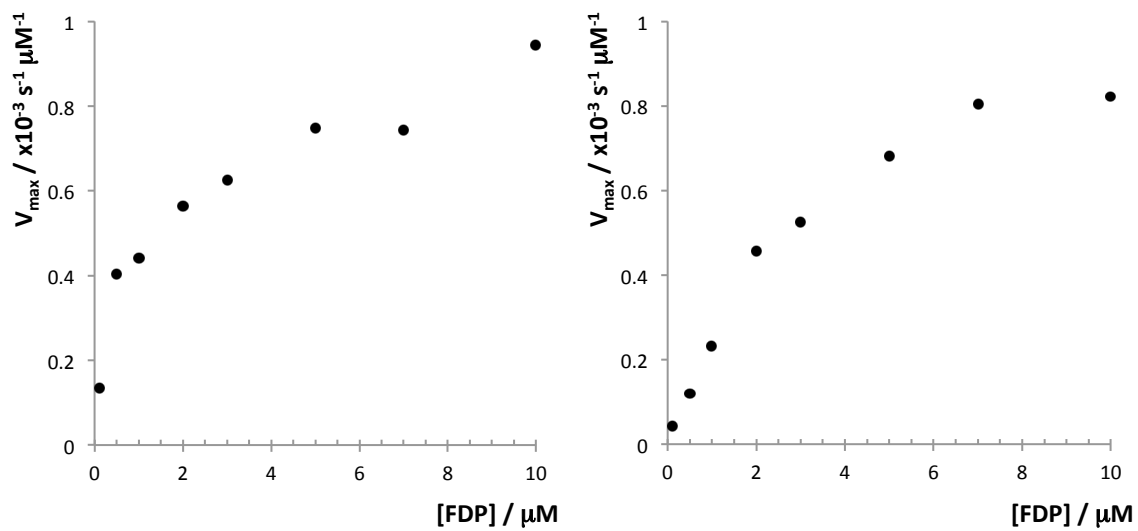

**Figure S4.** Representative Michaelis-Menten plot of Gdols-Y303F and Gdols-E307Q with FDP

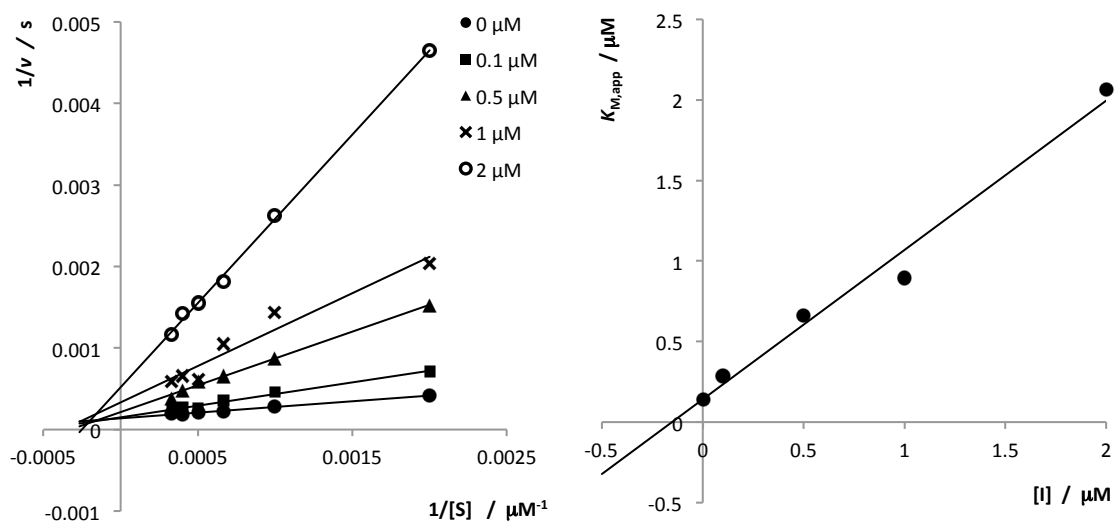

**Figure S5.** Double reciprocal plot for inhibition of GdIS catalysed turnover of **1a** at varying concentrations of **1b** (left) and plot of  $K_{M,app}$  against concentration of inhibitor for calculation of  $K_i$  (right).

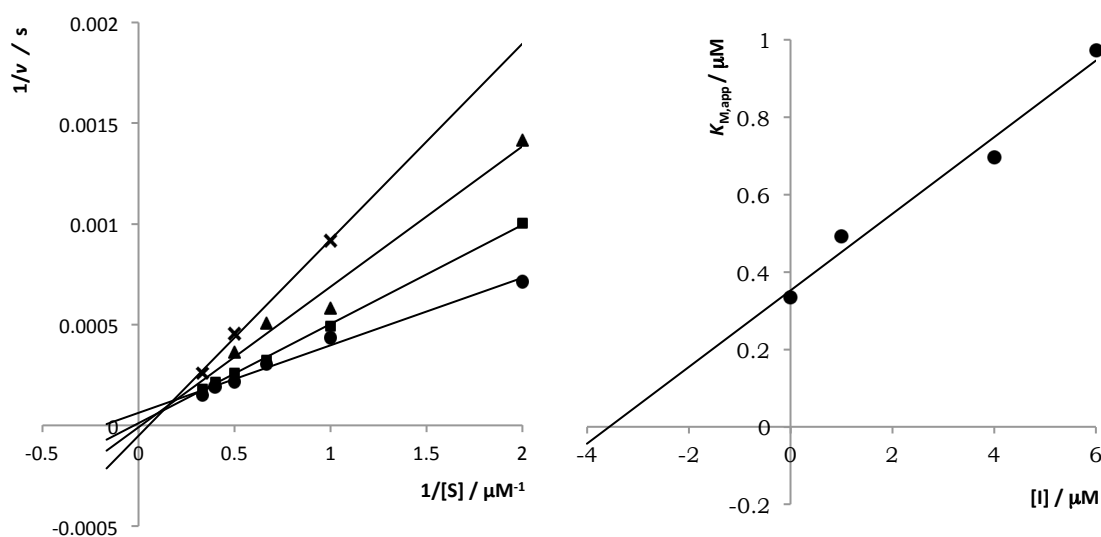

**Figure S6.** Double reciprocal plot for inhibition of GdIS catalysed turnover of **1a** at varying concentrations of **1c** (left) and plot of  $K_{M,app}$  against concentration of inhibitor for calculation of  $K_i$  (right).

**6. Analytical Incubation of GdIS with isoprenyl diphosphates.** A solution of 1  $\mu\text{M}$  GdIS and 200  $\mu\text{M}$  isoprenyl diphosphate in incubation buffer (250 mL, 50 mM Tris, 5 mM  $\beta\text{ME}$ , 5 mM  $\text{MgCl}_2$ , pH 8.0) was prepared. The aqueous layer was overlaid with HPLC grade pentane (0.5 mL) and the resulting mixture was gently agitated (6 - 18 h) at 25  $^\circ\text{C}$ . The incubations were repeated without enzyme as negative controls. The pentane extracts was then analyzed by gas chromatography-mass spectrometry (GC-MS) according to General Methods.

GdIS and FDP were incubated in buffer containing  $\text{H}_2^{18}\text{O}$  to study incorporation only, not as kinetic experiments. For the incubation of FDP and GdIS in 50%  $\text{H}_2^{18}\text{O}$  buffer (v/v), HEPES buffer (50 mM, pH 7.5, 125  $\mu\text{L}$ ) was diluted with  $\text{H}_2^{18}\text{O}$  (125  $\mu\text{L}$ ).  $\text{MgCl}_2$ , GdIS and FDP in  $\text{H}_2\text{O}$  were added to final concentrations of 2.5 mM, 1  $\mu\text{M}$  and 200  $\mu\text{M}$ , respectively, resulting in a solution of  $45 \pm 10$  mol%



H<sub>2</sub><sup>18</sup>O. This resulted in approximately 65% incorporation of <sup>18</sup>O into germacradien-4-ol as judged by MS (Fig. S8).

Peaks labelled  $\delta$  and  $\gamma$  are non-enzymatic resulting from rearrangement of **2** under mild acid.<sup>14,15</sup>  $\delta$ -cadinene ( $\delta$ ) was identified by comparison with a genuine enzymatic sample;<sup>16</sup>  $\gamma$ -cadinene ( $\gamma$ ) was putatively identified from the NIST mass spectra library.<sup>17</sup>

## 7. GC-MS Collection

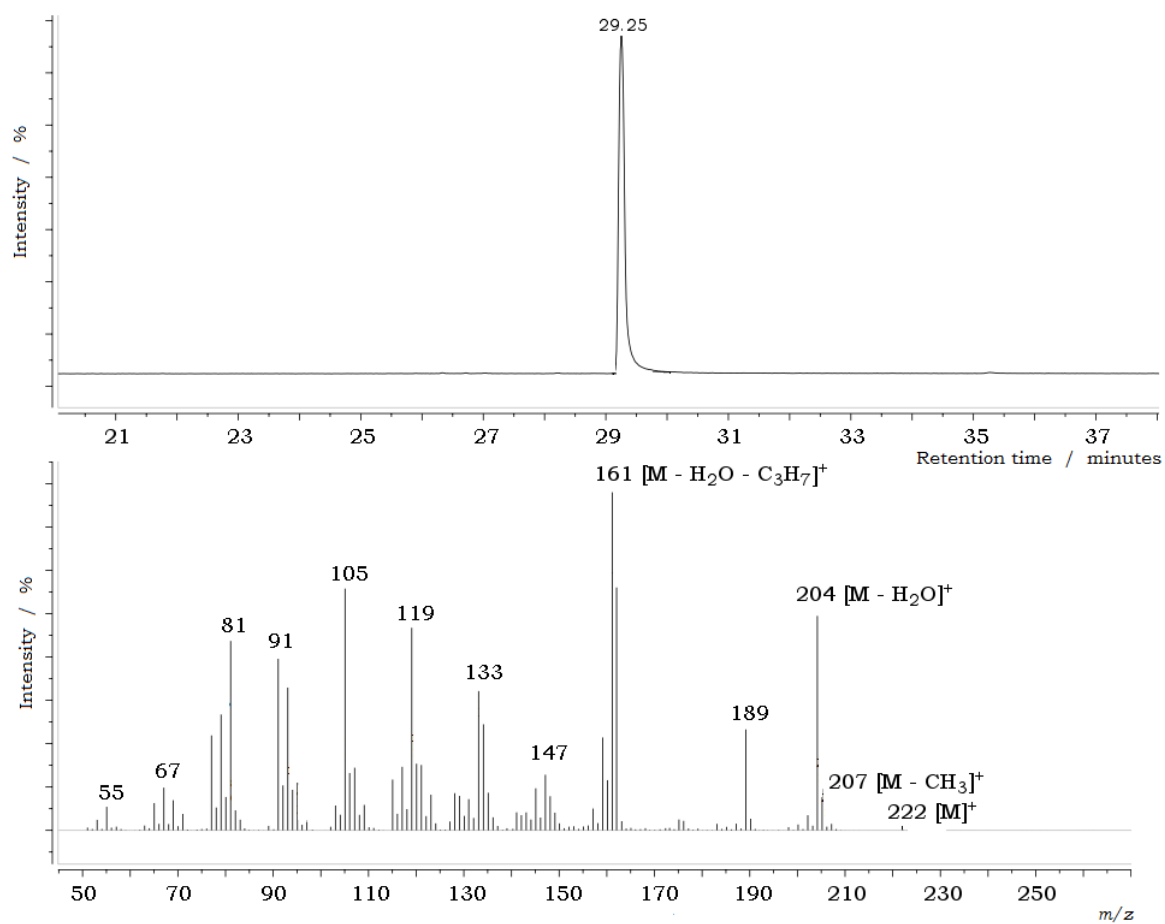

**Figure S7.** GC-MS (TOF-EI<sup>+</sup>) analysis of the pentane extracted products of an overnight incubation of Gdols with **1a**. Top, gas chromatogram. Below, mass spectrum (EI<sup>+</sup>) of the product at 29.25 minutes.

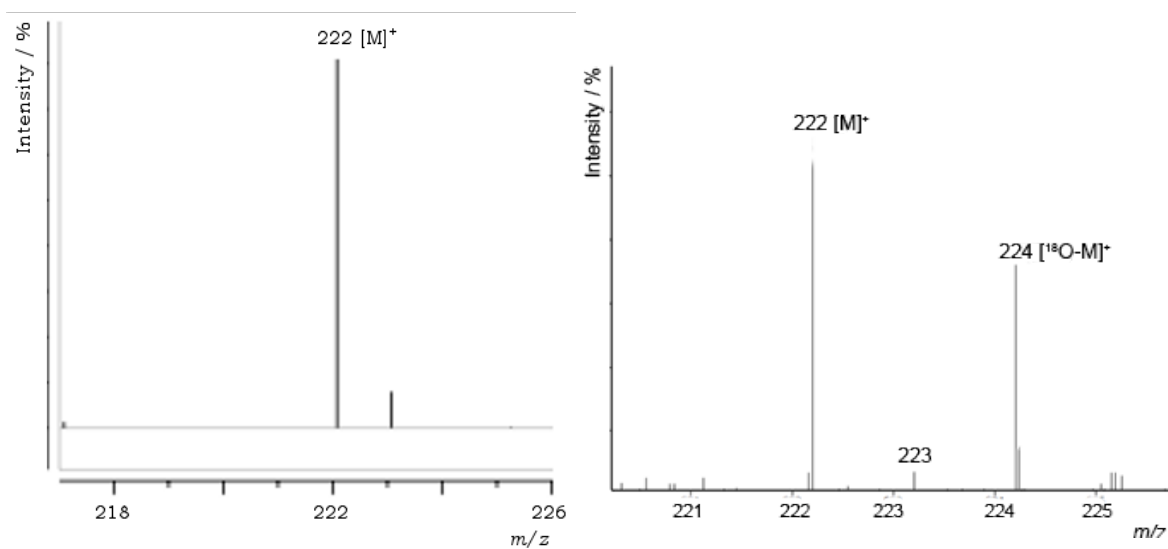

**Figure S8.** Mass spectra of germacradien-4-ol arising from incubation of GdolS and 1a in H<sub>2</sub>O buffer (top left) and 50 % H<sub>2</sub><sup>18</sup>O buffer (top right) Showing expansion of the molecular ion.

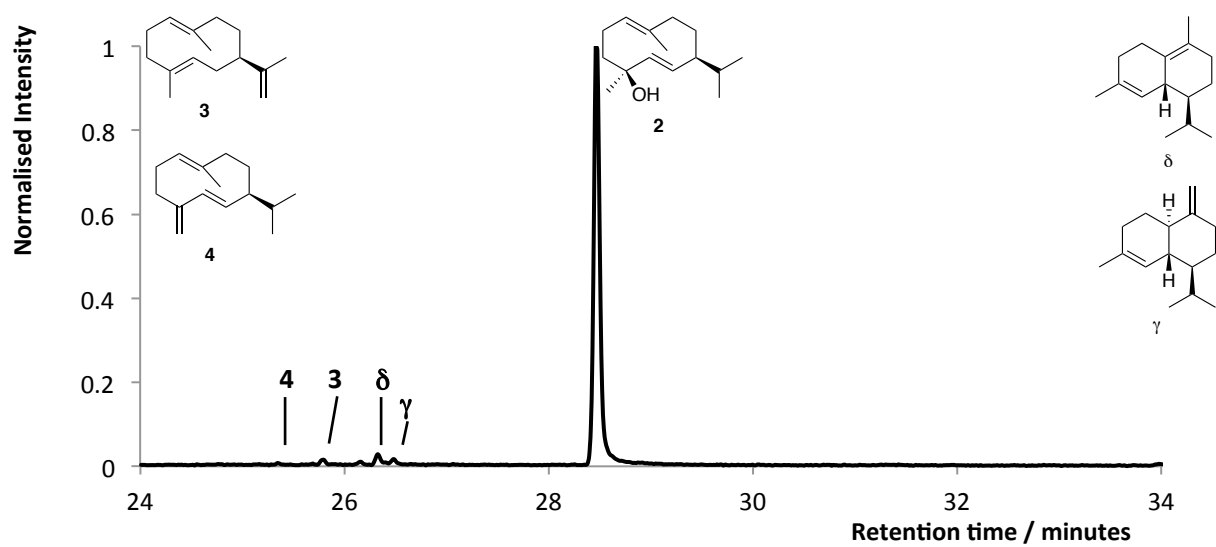

**Figure S9.** Total ion chromatogram (TOF-EI<sup>+</sup>) of the pentane extracted products of an overnight incubation of GdolS-D80E with 1a.

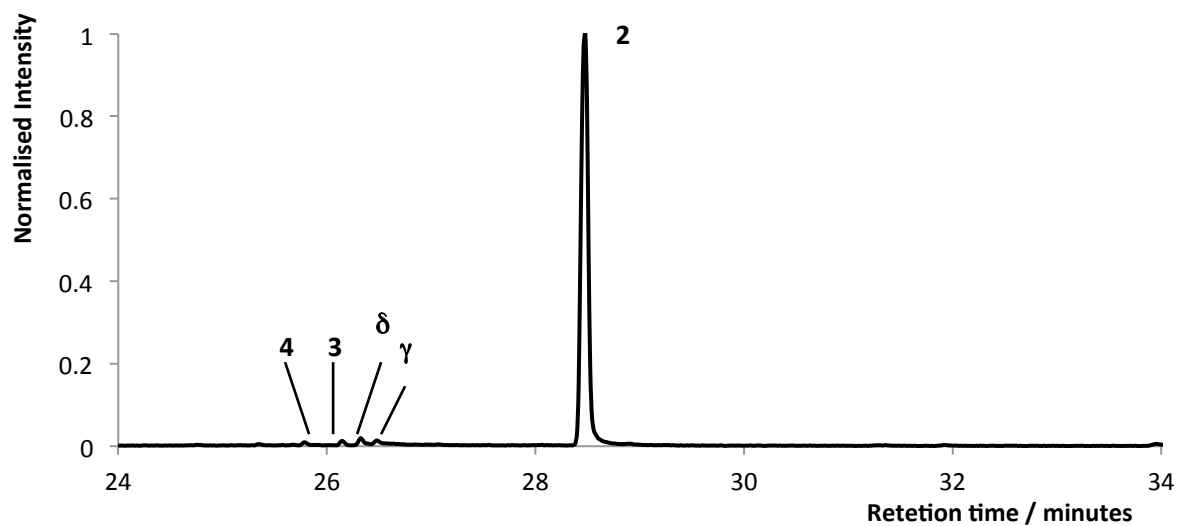

**Figure S10.** Total ion chromatogram (TOF-EI<sup>+</sup>) of the pentane extractable products of an overnight incubation of Gdols-D81E with **1a**.

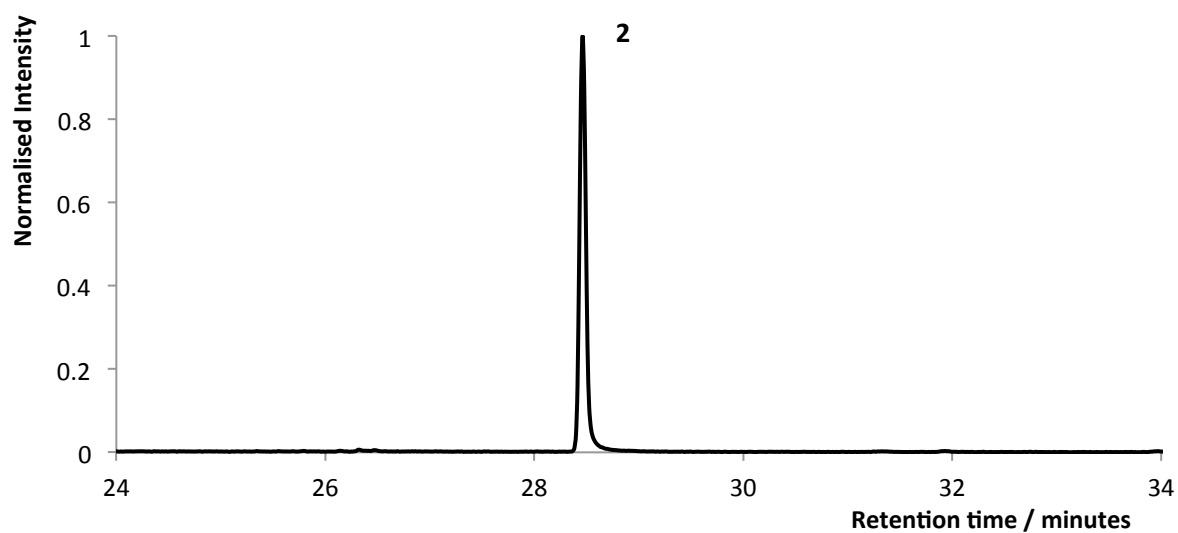

**Figure S11.** Total ion chromatogram (TOF-EI<sup>+</sup>) of the pentane extractable products from an overnight incubation of Gdols-D81N with **1a**.

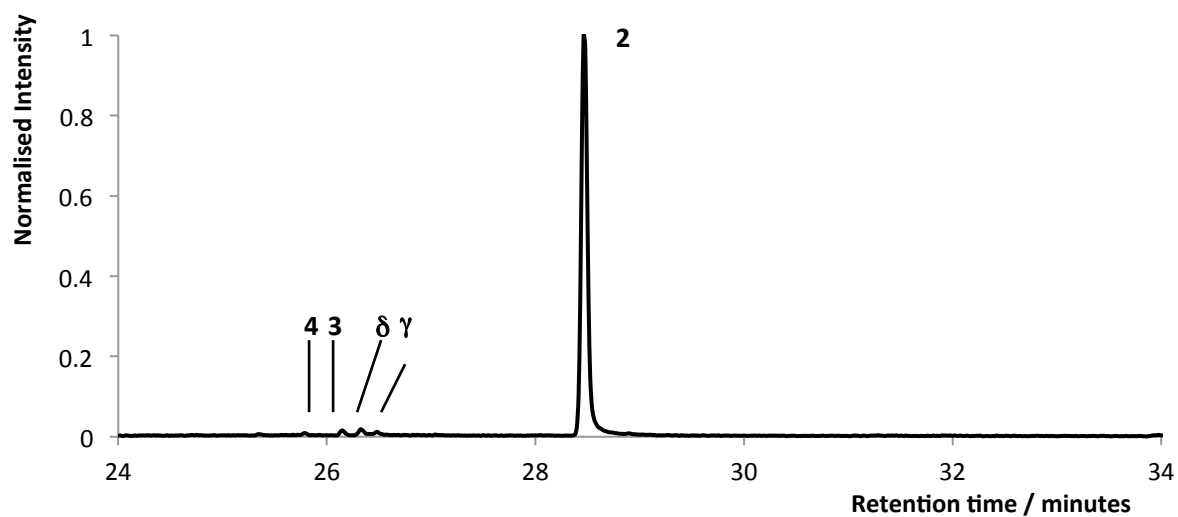

**Figure S12.** Total ion chromatogram (TOF-EI<sup>+</sup>) of the pentane extractable products from an overnight incubation of Gdols-D84E with **1a**.

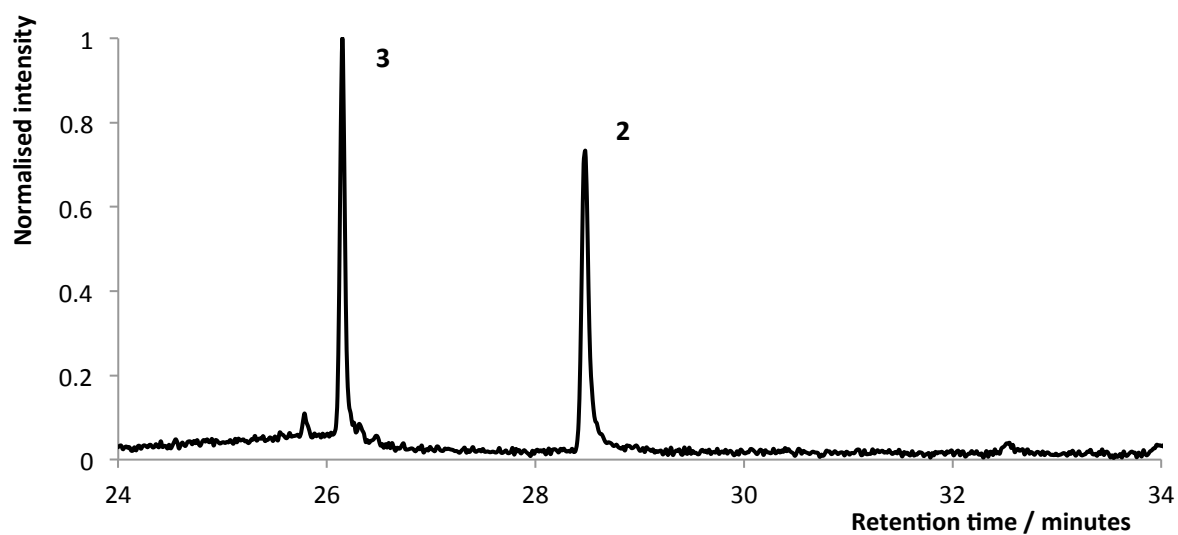

**Figure S13.** Total ion chromatogram (TOF-EI<sup>+</sup>) of the pentane extractable products from an overnight incubation of Gdols-N218Q with **1a**.

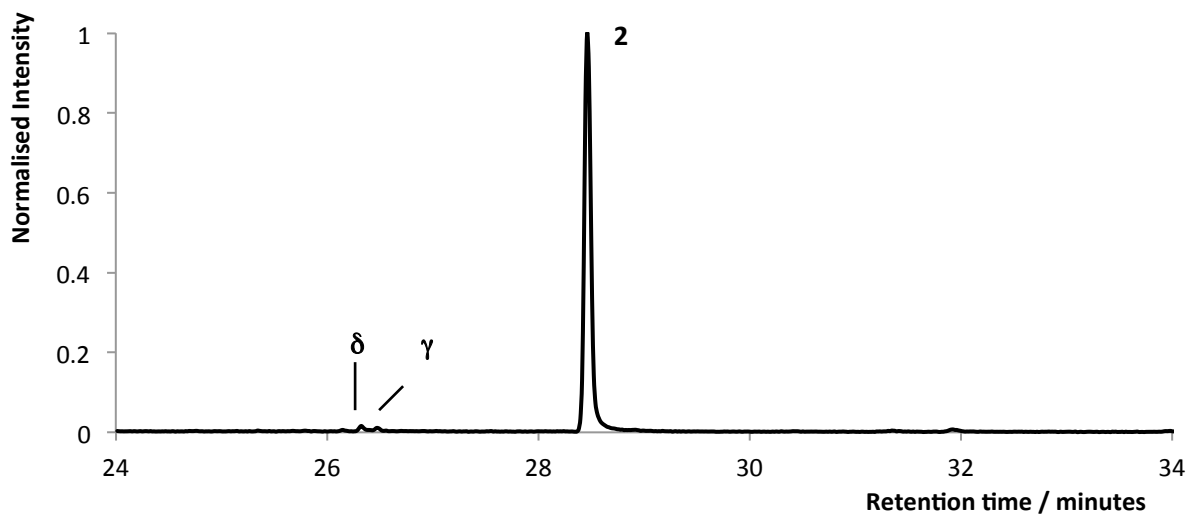

**Figure S14.** Total ion chromatogram (TOF-EI<sup>+</sup>) of the pentane extractable products from an overnight incubation of Gdols-N218L with **1a**.

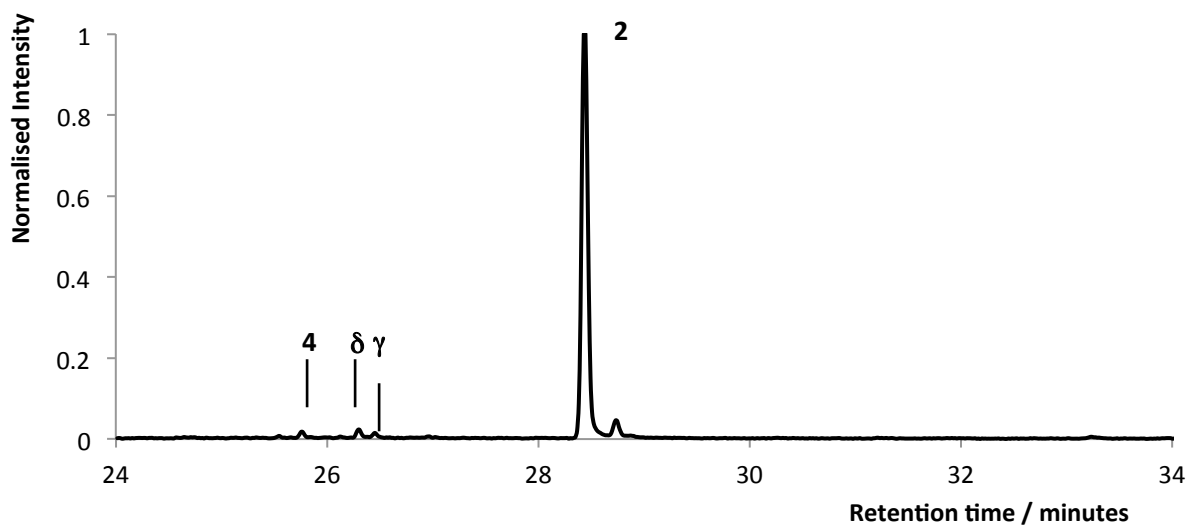

**Figure S15.** Total ion chromatogram (TOF-EI<sup>+</sup>) of the pentane extracted products of an overnight incubation of Gdols-S222A with **1a**.

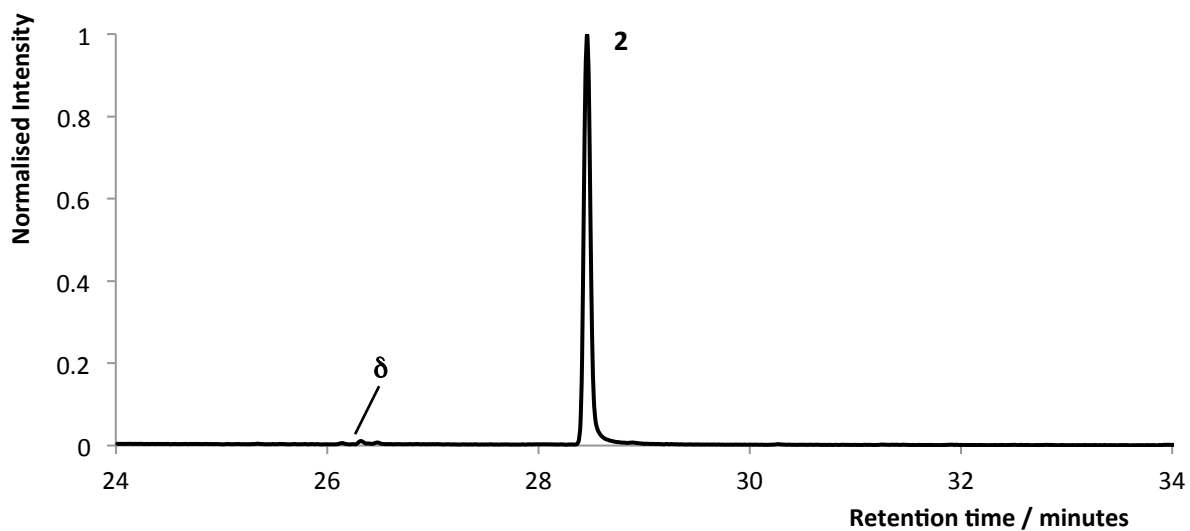

**Figure S16.** Total ion chromatogram (TOF-EI<sup>+</sup>) of the pentane extracted products of an overnight incubation of Gdols-E226D with **1a**.

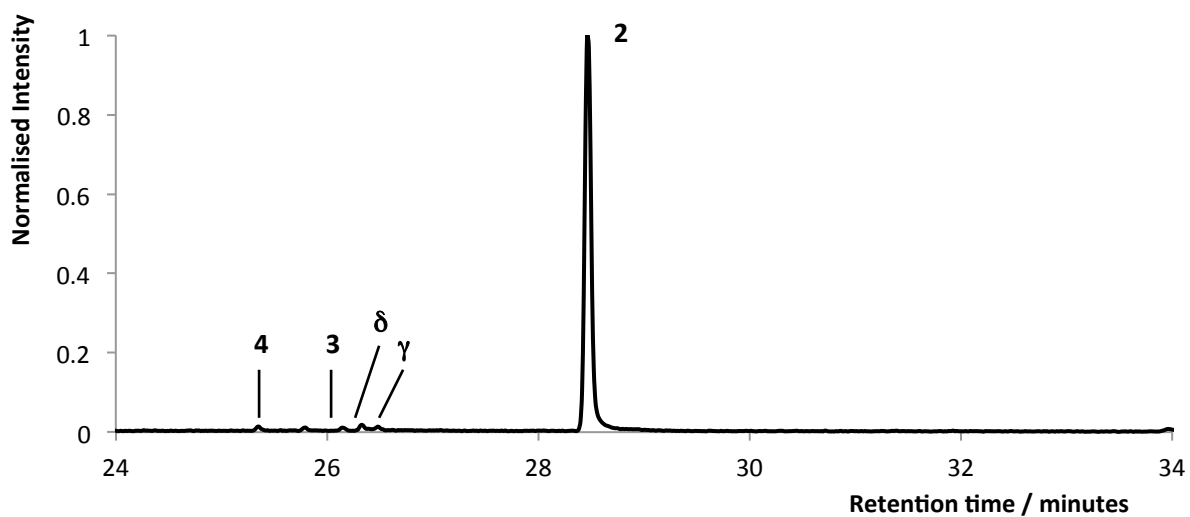

**Figure S17.** Total ion chromatogram (TOF-EI<sup>+</sup>) of the pentane extracted products of an overnight incubation of Gdols-E307Q with **1a**.

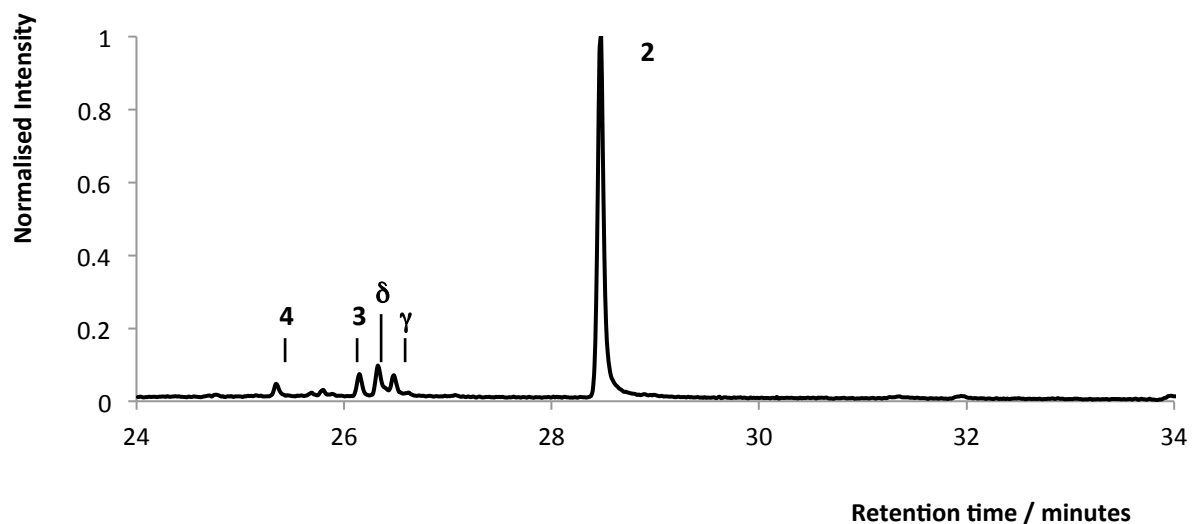

**Figure S18.** Total ion chromatogram (TOF-EI<sup>+</sup>) of the pentane extracted products of an overnight incubation of Gdols-E307M with **1a**.

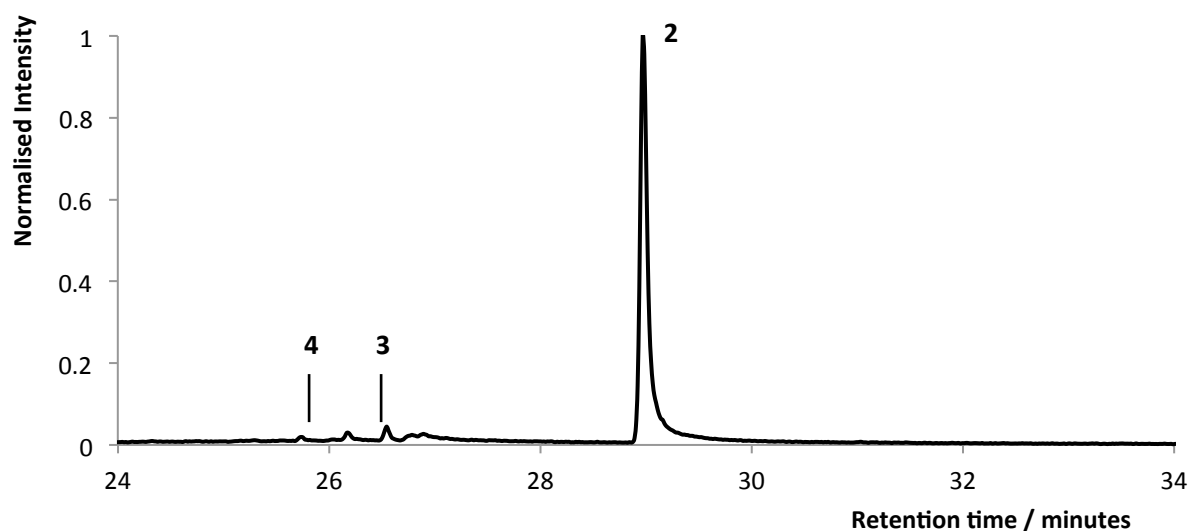

**Figure S19.** Total ion chromatogram (TOF-EI<sup>+</sup>) of the pentane extracted products of an overnight incubation of Gdols-Y303F with **1a**.



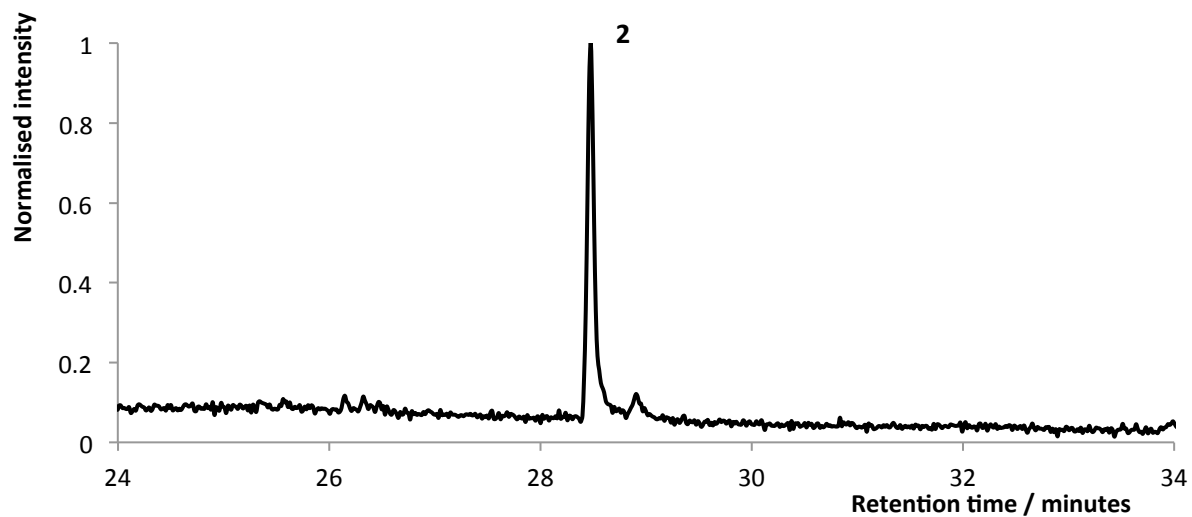

**Figure S20.** Total ion chromatogram (TOF-EI<sup>+</sup>) of the pentane extracted products of an overnight incubation of Gdols-Y303I with **1a**.

## 8. 12,13-difluoro-(*E*)- $\beta$ -farnesene

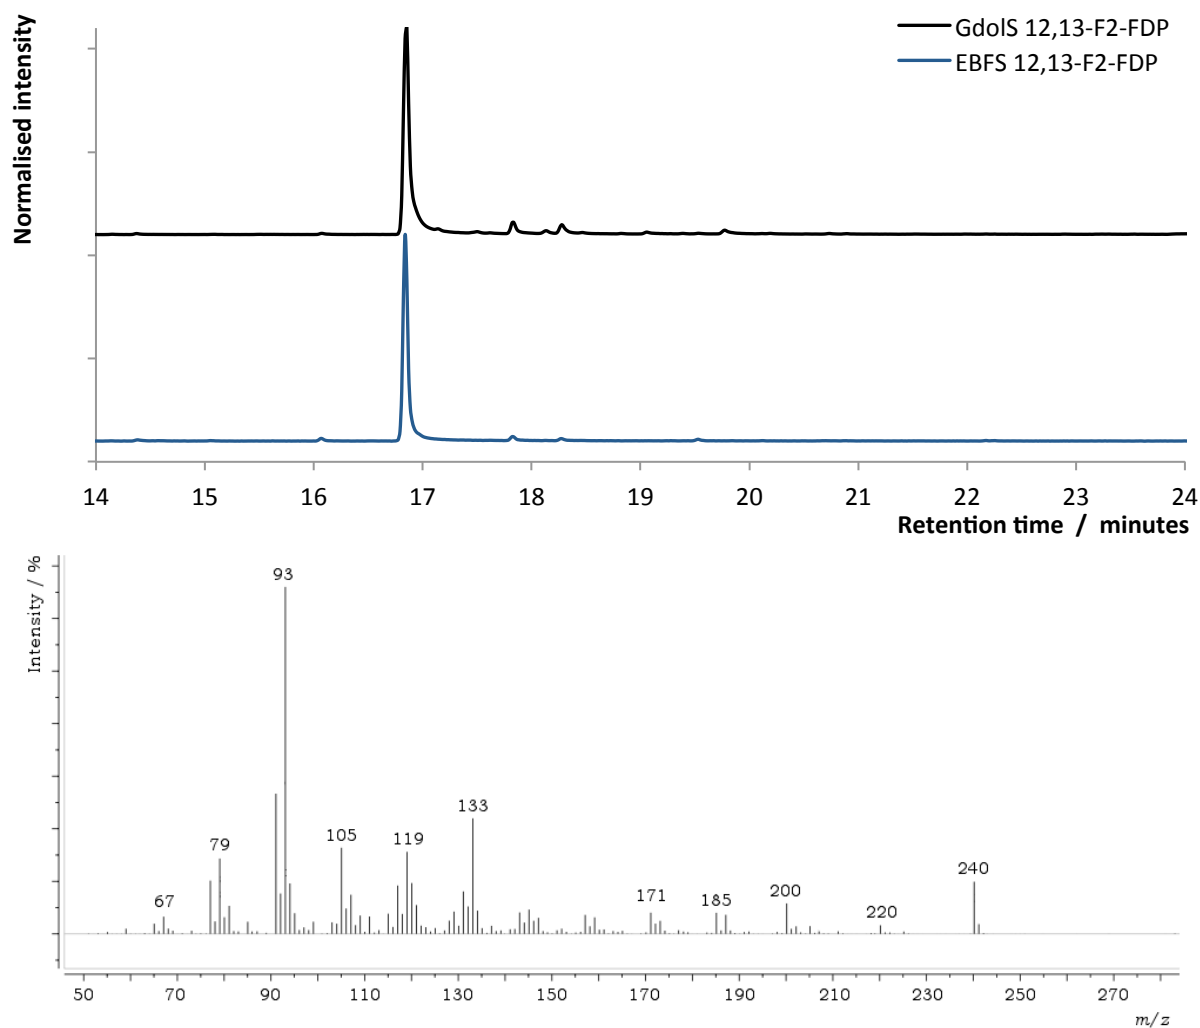

**Figure S21.** Total ion chromatogram (TOF-EI<sup>+</sup>) of the pentane extracted products of overnight incubations of GdoIS (Black) and (*E*)- $\beta$ -farnesene synthase<sup>18</sup> (EBFS, blue) with **1d**. Top, Gas chromatogram. Below, mass spectrum of the 12,13-F<sub>2</sub>-farnesene.

## Single Mass Analysis (displaying only valid results)

Tolerance = 10.0 PPM / DBE: min = -1.5, max = 50.0

Element prediction: Off

Monoisotopic Mass, Odd and Even Electron Ions

4 formula(e) evaluated with 1 results within limits (all results (up to 1000) for each mass)

Elements Used:

C: 0-15 H: 0-22 19F: 0-3

17-Jun-2015

DG\_EBFS\_12,13-F2\_170615 743 (16.823)

DG

School of Chemistry Cardiff University  
TOF MS EI+  
6.31e+003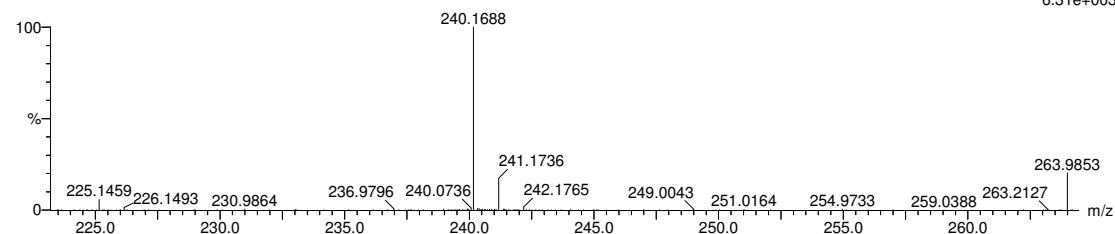

Minimum: -1.5  
Maximum: 5.0 10.0 50.0

| Mass     | Calc. Mass | mDa  | PPM  | DBE | i-FIT | Formula      |
|----------|------------|------|------|-----|-------|--------------|
| 240.1688 | 240.1690   | -0.2 | -0.8 | 4.0 | 0.4   | C15 H22 19F2 |

**Figure S22.** HR-MS (TOF-EI<sup>+</sup>) of 12,13-difluoro-(*E*)-β-farnesene.

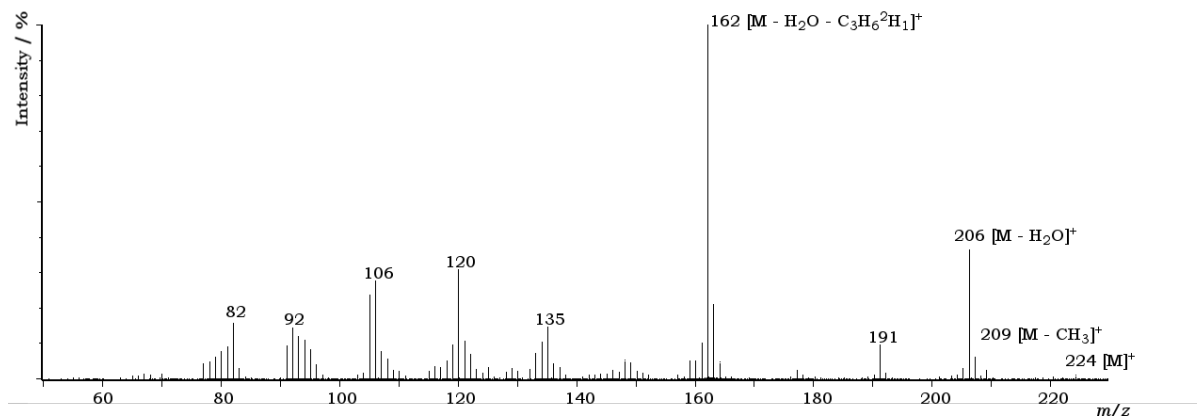

**Figure S23.** Mass spectrum (TOF-EI<sup>+</sup>) of **2** arising from incubation of Gdols and **1e**.

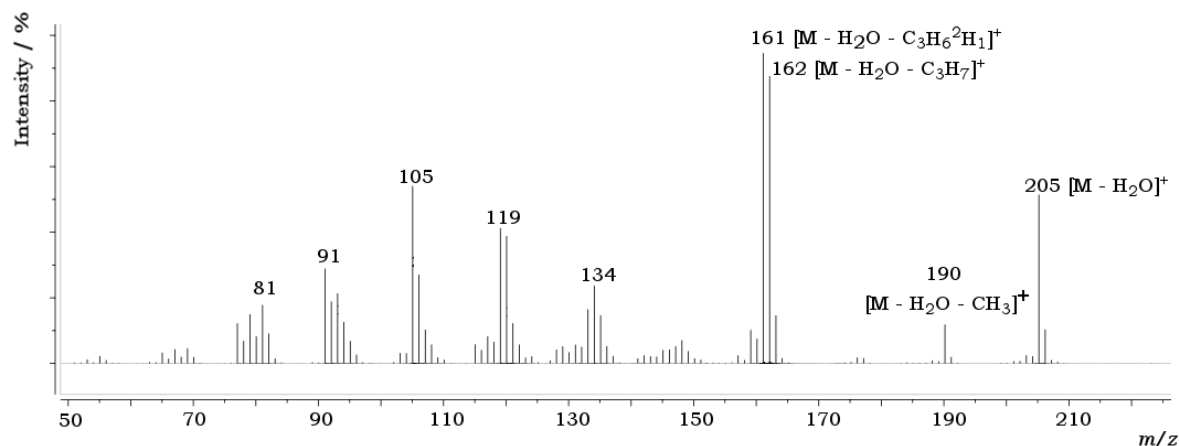

**Figure S24.** Mass spectrum (TOF-EI<sup>+</sup>) of **2** arising from incubation of Gdols and **1f**.

## 9. References

- (1) Woodside, A. B., Huang, Z. and Poulter, C. D. (1993) Trisammonium Geranyl Diphosphate. *Org. Synth. Coll. Vol. 8*, 616-620.
- (2) Faraldos, J. A, Zhao, Y., O'Maille, P. E., Noel, J. P. and Coates, R. M. (2007) Interception of the enzymatic conversion of farnesyl diphosphate to 5-epi-aristolochene by using a fluoro substrate analogue: 1-fluorogermaacrene A from (2E,6Z)-6-fluorofarnesyl diphosphate. *ChemBioChem* *8*, 1826-1833
- (3) Danilov, L. L., Mal'tsev, S. D. and Shibaev, V. N. (1988) *Soviet J. Bioorg. Chem.* *14*, 712-714.
- (4) Cramer, F. and Rittersdorf, W. R. (1967) Die hydrolyse von phosphaten und pyrophosphaten einiger monoterpenalkohole: Modellreaktionen zur biosynthese der monoterpene. *Tetrahedron* *23*, 3015-3022.
- (5) Conforth, R. H. and Popjak, G. (1969) Chemical syntheses of substrates of sterol biosynthesis. *Methods Enzymol.* *15*, 359-390.
- (6) Karp, F., Zhao, Y. Santhamma, B., Assink, B., Coates, R. M. and Croteau, R. B. (2007) Inhibition of monoterpene cyclases by inert analogues of geranyl diphosphate and linalyl diphosphate. *Arch. Biochem. Biophys.* *468*, 140-146.
- (7) Keller, R. K. and Thompson, R. (1993) Rapid synthesis of isoprenoid diphosphates and their isolation in one step using either thin layer or flash chromatography. *J. Chromatogr.* *645*, 161-167.
- (8) Miller D.J., Yu F.L. and Allemann R.K. (2007) Aristolochene Synthase-Catalyzed Cyclization of 2-Fluorofarnesyl-Diphosphate to 2-Fluorogermaacrene A. *ChemBioChem* *8*, 1819-1825.
- (9) Dolence J.M. and Poulter C.D., (1996) Synthesis of analogs of Farnesyl Diphosphate. *Tetrahedron* *52*, 119-130.
- (10) Cane D. E. and Ha H.-J. (1988) Trichodiene Biosynthesis and the role of Nerolidyl Pyrophosphate in the Enzymatic Cyclization of Farnesyl Pyrophosphate *J. Am. Chem. Soc.* *110*, 6865-6870.

- (11) Cuvigny T., Julia M. and Rolando C., (1984) Stereoselective  $\gamma$ -cis-vinylic metallation of tertiary allylic alcohols. *J. Chem. Soc., Chem. Commun.* 8.
- (12) Cane D.E., Oliver J.S., Harrison P.H.M., Abell C., Hubbard B.R., Kane C.T. and Lattman R., (1990) Biosynthesis of Pentalenene and Pentalenolactone. *J. Am. Chem. Soc.* 112, 4513-4524
- (13) Gonzalez V., Touchet S., Grundy D.J., Faraldos J.A. and Allemann R.K., Evolutionary and Mechanistic Insights from the Reconstruction of  $\alpha$ -Humulene Synthases from a Modern (+)-Germacrene A Synthase. (2014) *J. Am. Chem. Soc.* 136, 14505-14512.
- (14) Raldugin V., Salenko, V. and Gamov, N. (1980) 5S,8S-Germacra-1E,6E-dien-5-ol from the Oleoresin of *Picea ajanensis* and its biomimetic cyclization. *Chem. Nat. Comp.* 154-158.
- (15) Nordin O., Hedenström E. and Högberg H.-E., (1999) Stereochemistry of 1,6-Germacradien-5-ol, a Constituent of the Needles of Scots Pine (*Pinus sylvestris*) and of the Defence Secretion from Larvae of the Pine Sawfly *Neodiprion sertifer*. *Acta Chem. Scand.* 53, 124-132.
- (16) Gennadios H.A., Gonzalez V., Di Costanzo L., Li A.A., Yu F.L., Miller D.J., Allemann, R.K. and Christianson, D. W. (2009) Crystal Structure of (+)-delta-Cadinene Synthase from *Gossypium arboreum* and Evolutionary Divergence of Metal Binding Motifs for Catalysis. *Biochemistry* 48, 6175-6183.
- (17) Stein S., Mirokhin Y., Tchekhovskoi D., Mallard G., Mikaia A., Neta P., Sparkman D., White E., Yang X., Zaikin V. and Zhu D. NIST Mass Spectral Search Program. Version 2.0 g. build May 19 2011.
- (18) Faraldos J.A., Gonzalez V., Li A.A., Yu F.L. Koksals M., Christianson D.W. and Allemann R.K., (2012) Probing the Mechanism of 1, 4-Conjugate Elimination Reactions Catalyzed by Terpene Synthases. *J. Am. Chem. Soc.* 134, 20844-20848.
